# Supplementary material for: Arabia Felix 2.0: a cross-linguistic Twitter analysis of happiness patterns in the United Arab Emirates
Source: Springer Nature journal article supplement (doi:10.1186/s40537-019-0195-2), 2019-04-15
Supplement: 40537_2019_195_MOESM1_ESM.pdf [file 40537_2019_195_MOESM1_ESM.pdf]

## Supplementary Information

Table S1: Arabic words and its translations.

| Arabic       | English            | Arabic | English         |
|--------------|--------------------|--------|-----------------|
| أحب          | I love             | حبلك   | Crochet         |
| أحبك         | I love you         | حبيبي  | My love         |
| اف           | F                  | حبيبي  | Baby            |
| أكره         | I hate             | دم     | blood           |
| الجنائزة     | The funeral        | رب     | God             |
| الجنة        | the Paradise       | ربي    | my Lord         |
| الحب         | the love           | زفاف   | wedding         |
| الحرز        | Sorrow             | سعادة  | Happiness       |
| الحياة       | Life               | سوء    | Ill             |
| الخير        | The good           | شر     |                 |
| Evil السعادة | Happiness          | صعب    | Hard            |
| العظيم       | Great              | ضد     | against         |
| العيد        | Eid                | ضيق    | tight           |
| الفوز        | the win            | عبد    | Slave           |
| القبر        | Grave              | عيب    | disadvantage    |
| الله         | Allah              | قبر    | Grave           |
| الموت        | the death          | قلبي   | My heart        |
| النار        | fire               | كسر    | broke down      |
| أم           | Mother             | لله    | Allah           |
| أموت         | I die              | مات    | Die             |
| أمي          | Mom                | مبروك  | Congratulations |
| أجمل         | The most beautiful | محمد   | Mohammed        |
| أحبك         | I love you         | مرضى   | Patient         |
| ألم          | Pain               | مستحيل | No way          |
| أم           | Mother             | مقتل   | Killing         |
| أمي          | Mom                | موت    | death           |
| بالله        | By God             | ميت    | dead            |
| تبا          | Damn               | وفاة   | death           |
| تعبت         | get tired          | يعاني  | Suffers         |
| عيدكم مبارك  | eaydakum mubarak   | حب     | Love            |
| عيد الأضحى   | Eid_Adha           |        |                 |

## Validity Check

Prior to the larger analytic studies, we first conduct a brief validity check for some common sense words for both the Arabic and the English tweets in line with the previous studies [16,35]. The purpose is to make sure that our subsequent word-based analyses of tweets are actually meaningful.

Fig. S1(a) shows the hourly peak occurrences for the Arabic tweets with the morning words such as “good morning” and “morning” and the evening words such as “good evening” and “evening”. As can be seen in the figure the morning peaks occur around 7:00 am and 8:00 am and the evening peak, albeit less pronounced, ensues around 6:00 pm up until 3:00 am, as expected.

Fig. S1(b) presents the hourly peak occurrences of the English tweets which contain morning words such as “morning”, “breakfast”; these peaks occur around 6:00 am and 7:00am. However, the peak occurrences for evening words such as “night” and “dinner” happen around 11:00 pm to 3:00 am. These patterns are both intuitive and consistent with the findings of the previous research [18].

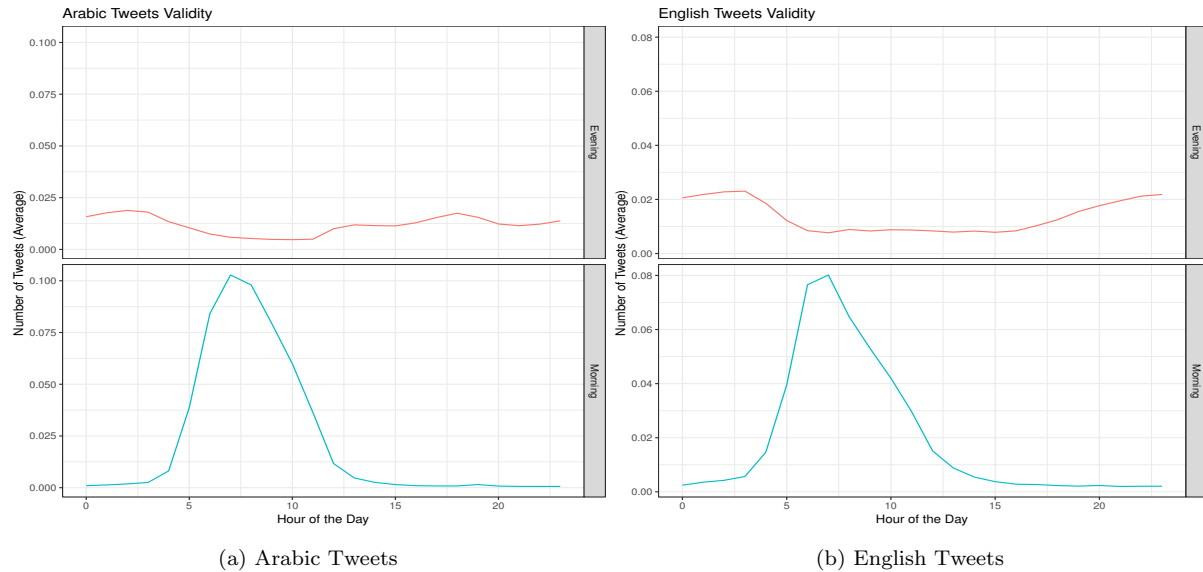

Fig. S1: Tweets distributions of morning and evening words of Arabic and English tweets with morning and evening keywords over hours of the day.

Table S2: Peak days for Arabic tweets and most popular hashtags.

| Emirates       | Date       | (#tweets,Hashtag)                                                                  | Event                     |
|----------------|------------|------------------------------------------------------------------------------------|---------------------------|
| UAE            | 2016-07-06 | ( قواتنا المسلحة - عيدكم مبارك , 50 ) ( عيد الفطر , 84 ) ( عيدكم مبارك , 201 )     | Eid                       |
|                | 2016-09-12 | ( عيدكم مبارك , 35 ) ( عيد الأضحى , 56 ) ( جنودنا البواسل - عيدكم مبارك , 56 )     | Eid                       |
|                | 2016-06-05 | ( امتحان الفيزياء ثاني عشر علمي , 41 ) ( رمضان - كريم , 81 ) ( رمضان , 518 )       | Ramadan                   |
| Abu Dhabi      | 2016-09-06 | ( نعم نستطيع , 96 ) ( الامارات اسقاليا , 108 ) ( مما نستطيع , 156 )                | Not clear                 |
|                | 2016-06-05 | ( امتحان الفيزياء ثاني عشر علمي , 19 ) ( رمضان - كريم , 28 ) ( رمضان , 217 )       | Ramadan                   |
|                | 2016-11-02 | ( زايد , 24 ) ( العين الفياض , 31 ) ( ذكري وفاة الشيخ زايد , 222 )                 | Sheikh Zayed memorial day |
| Dubai          | 2016-09-12 | ( عيدكم مبارك , 13 ) ( عيد الأضحى , 14 ) ( منتخب عربية , 15 )                      | Eid                       |
|                | 2016-07-06 | ( عيدكم سعيد - مبارك , 14 ) ( عيد الفطر , 30 ) ( عيدكم مبارك , 84 )                | Eid                       |
|                | 2016-07-08 | ( دالاس , 18 ) ( نول ١٠٢ , ٦١ ) ( نول ١٠٢ الف , 26 )                               | Music                     |
| Ajman          | 2016-07-06 | ( عيد مبارك , 3 ) ( عيد الفطر , 5 ) ( عيدكم مبارك , 8 )                            | Eid                       |
|                | 2016-06-05 | ( قراء ديني , 7 ) ( سيرة هلال , 8 ) ( رمضان , 24 )                                 | Ramadan                   |
|                | 2016-07-05 | ( تضجير المدينة المنورة , 7 ) ( سيرة هلال , 8 ) ( رمضان , 12 )                     | Ramadan                   |
| Umm Al Quwain  | 2016-07-06 | ( قواتنا المسلحة - عيدكم مبارك , 1 ) ( اللهم آمين , 1 ) ( الامميرك , 2 )           | Eid                       |
|                | 2016-06-05 | ( بلستنسكي , 1 ) ( رمدين , 1 ) ( رمضان , 3 )                                       | Ramadan                   |
|                | 2016-05-28 | ( العين الخيرية , 1 ) ( رمدين , 1 ) ( عيناوي , 1 )                                 | Sport                     |
| Fujairah       | 2016-12-02 | ( اليوم الوطني ٥٤ , 11 ) ( ٢ - ديسمبر ١٧٩١ , 27 ) ( اليوم الوطني - ٤٥ , 51 )       | National Day              |
|                | 2016-09-12 | ( كل عام وانتم بخير , 2 ) ( عيدكم مبارك , 2 ) ( جنودنا البواسل - عيدكم مبارك , 5 ) | Eid                       |
|                | 2016-07-06 | ( العيوبه الجماعيه , 4 ) ( قواتنا المسلحة - عيدكم مبارك , 6 ) ( عيدكم مبارك , 13 ) | Eid                       |
| Sharjah        | 2016-07-06 | ( قواتنا المسلحة - عيدكم مبارك , 16 ) ( عيدكم مبارك , 17 ) ( عيد الفطر , 19 )      | Eid                       |
|                | 2016-09-12 | ( عيد الأضحى , 6 ) ( شعراء مختارة , 11 ) ( صحيفة الخليج , 11 )                     | Eid                       |
|                | 2014-07-28 | ( عيدكم مبارك , 8 ) ( العيد , 10 ) ( عيد الفطر , 10 )                              | Eid                       |
| Ras Al Khaimah | 2016-09-12 | ( كل عام وانتم بخير , 3 ) ( عيد الأضحى , 4 ) ( جنودنا البواسل - عيدكم مبارك , 6 )  | Eid                       |
|                | 2016-07-06 | ( الامميرك , 4 ) ( عيد الفطر , 7 ) ( عيدكم مبارك , 13 )                            | Eid                       |
|                | 2017-06-25 | ( الامميرك , 4 ) ( عيد الفطر , 12 ) ( رئيس الدولة يستقبل الحاكم , 10 )             | Eid                       |

Table S3: Peak days for English tweets and most popular hashtags.

| Emirates       | Date       | (#tweets,Hashtag)                                                                          | Event                         |
|----------------|------------|--------------------------------------------------------------------------------------------|-------------------------------|
| UAE            | 2017-01-01 | ( 255 , happynewyear ) ( 120 , newyear ) ( 92 , burj Khalifa )                             | New Year                      |
|                | 2016-01-01 | ( 312 , happynewyear ) ( 217 , aldubhappybaedayalden ) ( 164 , aldubwelcomes2016 )         | New Year                      |
|                | 2015-10-24 | ( 6884 , aldubebtamangpanahon ) ( 378 , pushawardsizquens ) ( 135 , aldubebtamangpanahon ) | Filipino program              |
| Abu Dhabi      | 2016-11-27 | ( 160 , abudhabigp ) ( 138 , fl ) ( 47 , formula1 )                                        | Sport                         |
|                | 2015-11-28 | ( 156 , abudhabigp ) ( 98 , aldubstaystrong ) ( 88 , fl )                                  | Sport                         |
|                | 2017-01-01 | ( 65 , happynewyear ) ( 43 , aldenat25 ) ( 32 , aldubhdalden )                             | New Year and Filipino program |
| Dubai          | 2016-01-01 | ( 204 , happynewyear ) ( 119 , aldubhappybaedayalden ) ( 107 , aldubwelcomes2016 )         | New Year                      |
|                | 2017-01-01 | ( 161 , happynewyear ) ( 89 , burj Khalifa ) ( 82 , newyear )                              | New Year                      |
|                | 2015-12-31 | ( 157 , happynewyear ) ( 112 , aldub24thweeksary ) ( 102 , mydubaineyear )                 | New Year                      |
| Ajman          | 2016-01-01 | ( 7 , goodloveneverdies ) ( 7 , dsf2016 ) ( 5 , dubai )                                    | Not clear                     |
|                | 2016-07-16 | ( 13 , qandeelbaloch ) ( 8 , queen ) ( 4 , pakistan )                                      | Not clear                     |
|                | 2016-10-01 | ( 1 , hellooctober ) ( 1 , wassaymughal ) ( 1 , octoberianrocks )                          | Not clear                     |
| Umm Al Quwain  | 2016-01-01 | ( 3 , happynewyear ) ( 2 , villaimelda ) ( 2 , newyear2016 )                               | New Year                      |
|                | 2016-03-04 | ( 2 , kanhaiyakumar ) ( 1 , goodnight ) ( 1 , gulfcraft )                                  | Not clear                     |
|                | 2016-10-14 | ( 1 , serious ) ( 1 , cousins )                                                            | Not clear                     |
| Fujairah       | 2016-12-02 | ( 6 , uae ) ( 3 , stylish.collection ) ( 3 , uaapfinals )                                  | Not clear                     |
|                | 2016-10-07 | ( 7 , lionheartroarsincinemas ) ( 1 , fashionexpression ) ( 1 , artphoto )                 | Style                         |
|                | 2015-10-16 | ( 4 , bull ) ( 4 , fight ) ( 3 , theshadesandscarf )                                       | Not Clear                     |
| Sharjah        | 2016-01-01 | ( 73 , aldubhappybaedayalden ) ( 22 , happynewyear ) ( 12 , aldubwelcomes2016 )            | New Year and Filipino program |
|                | 2015-11-12 | ( 65 , showtimetomiho ) ( 37 , sibf15 ) ( 33 , aldub17thweeksary )                         | Filipino program              |
|                | 2015-09-26 | ( 829 , aldubebforlove ) ( 31 , showtimekapamilyaday ) ( 16 , aldubandproud )              | Filipino program              |
| Ras Al Khaimah | 2015-12-02 | ( 35 , mamaredcarpet ) ( 7 , aldublovegoeson ) ( 5 , aldub20thweeksary )                   | Song                          |
|                | 2016-12-02 | ( 5 , uanationalday ) ( 4 , wakeboarding ) ( 3 , holiday )                                 | National Day                  |
|                | 2016-01-01 | ( 3 , happynewyear ) ( 3 , aldubhappybaedayalden ) ( 2 , aldubwelcomes2016 )               | New Year and Filipino program |

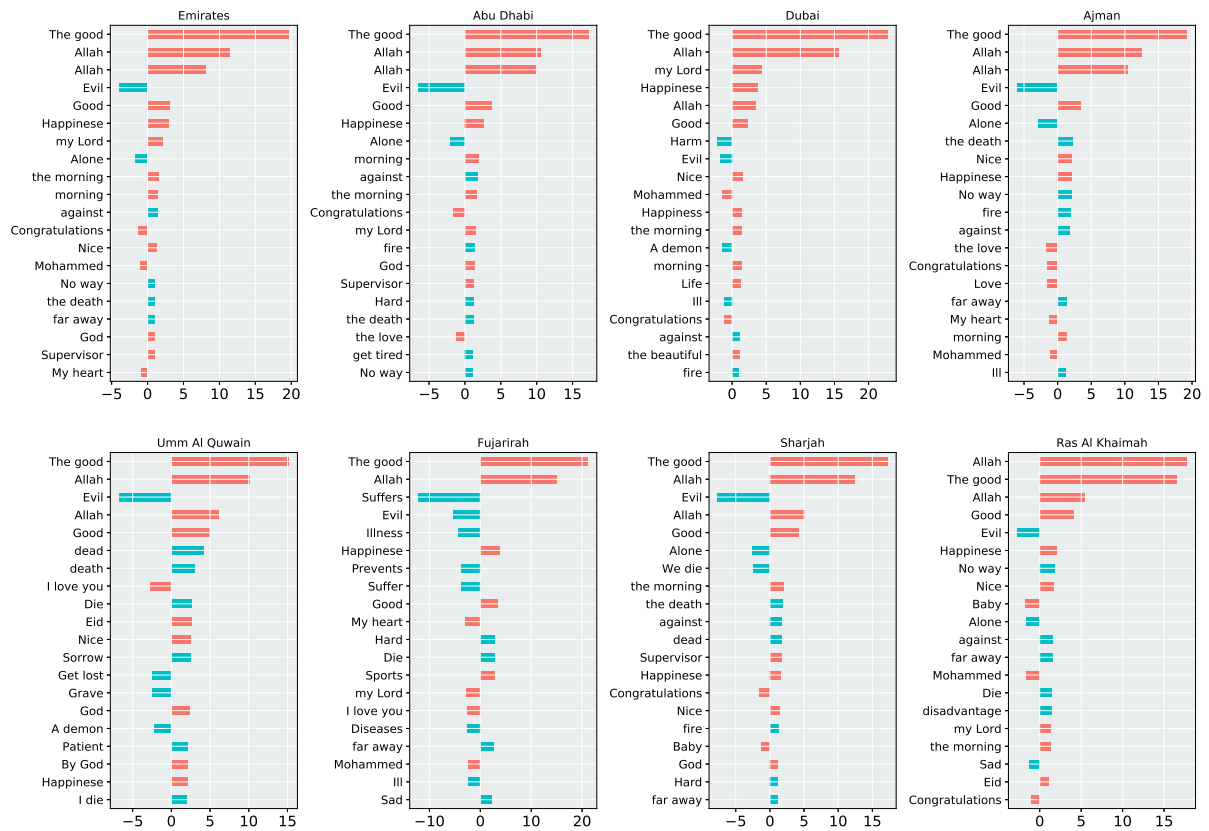

Fig. S2: Arabic Word shift graph for happiest hour for each city.

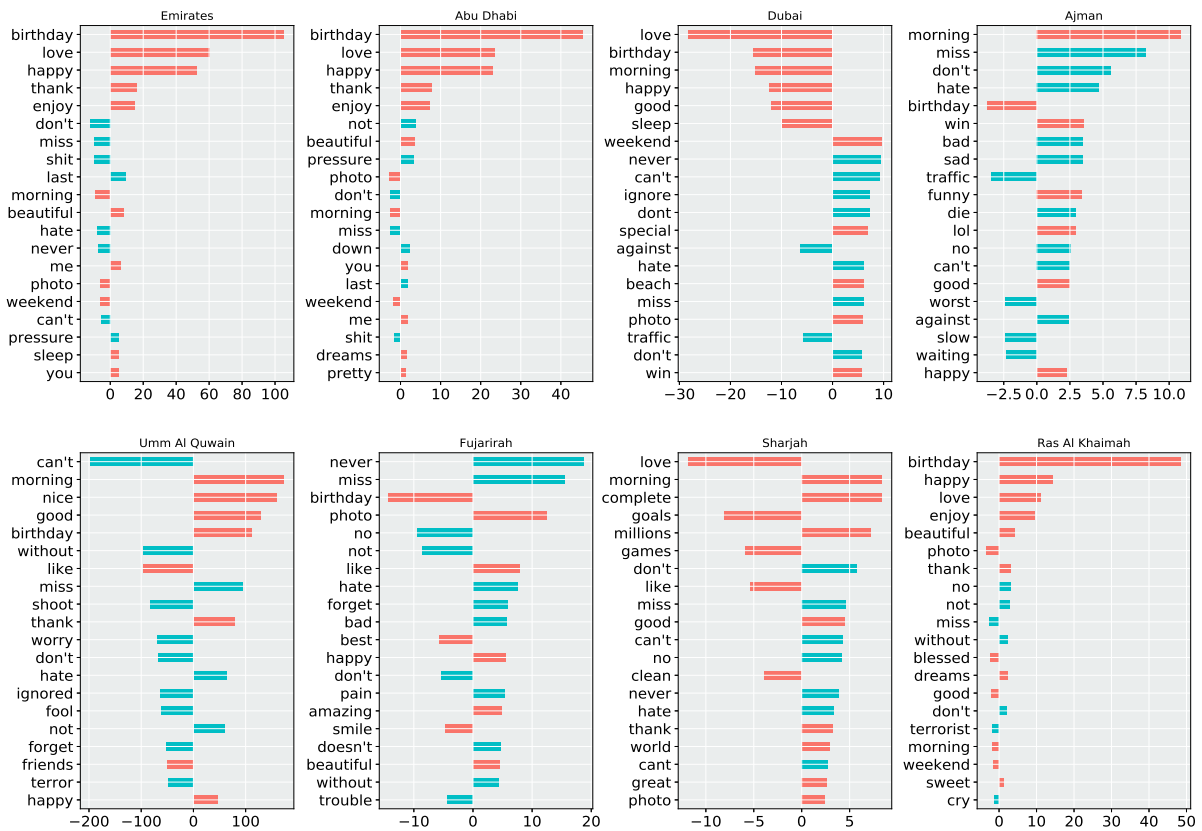

Fig. S3: English Word shift graph for happiest hour for each city.

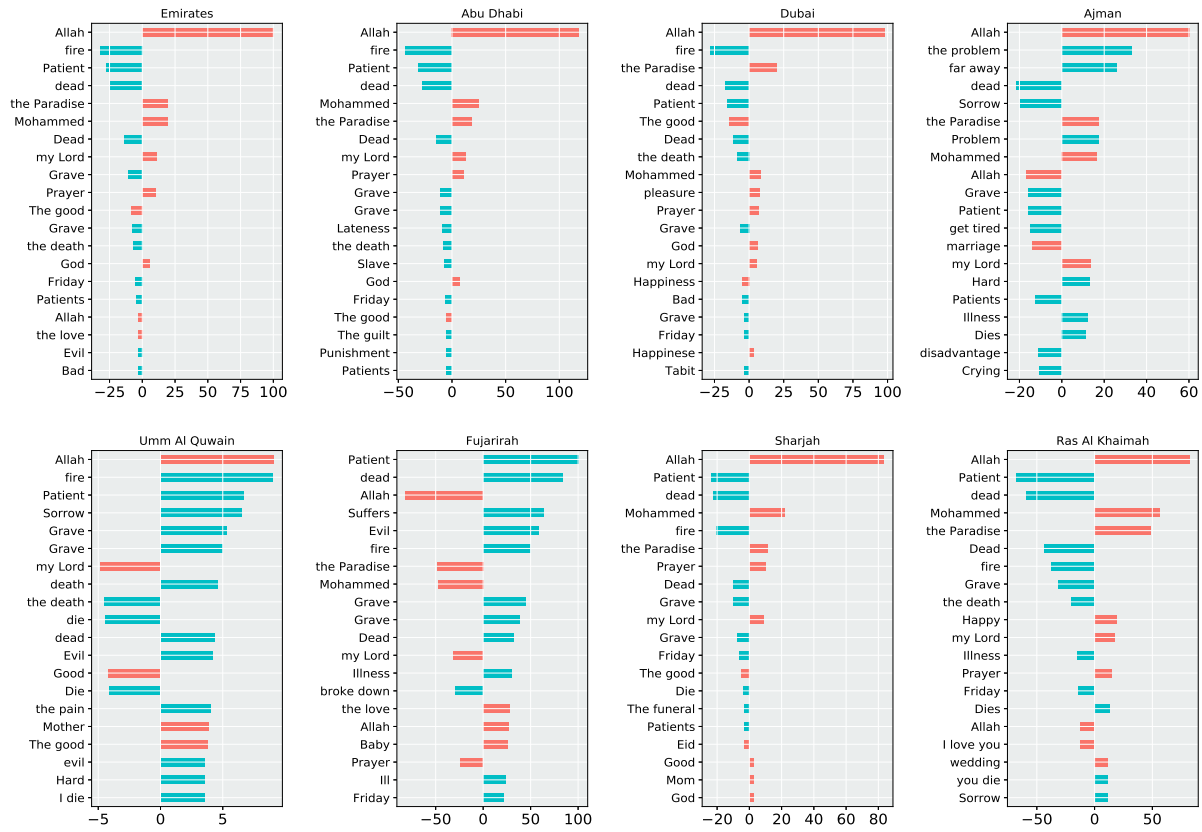

Fig. S4: Arabic word shift graph for the happiest day of the week of each city.

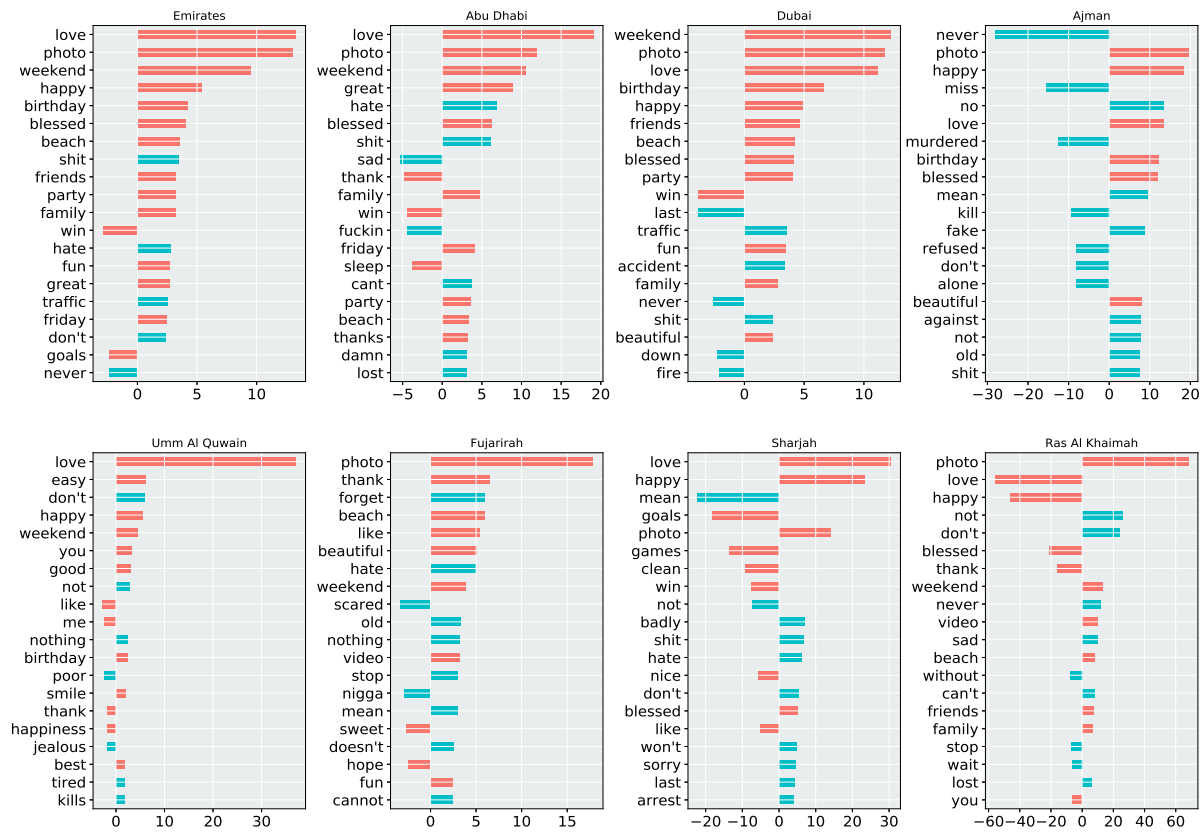

Fig. S5: English word shift graph for the happiest day of the week of each city.

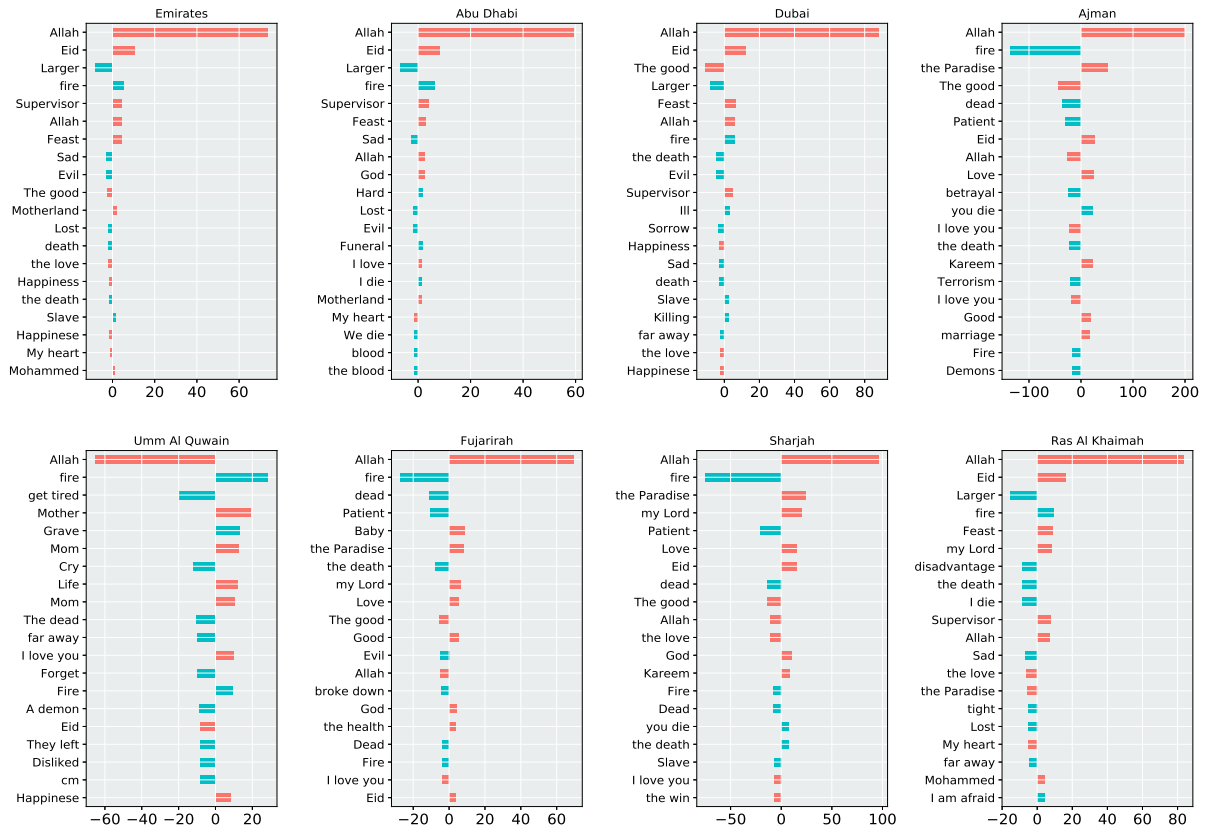

Fig. S6: Arabic word shift graph for the happiest month of each city.
